# Supplementary material
Source: PubMed Central journal article supplement (PMC10192061)

**Fig.1c**

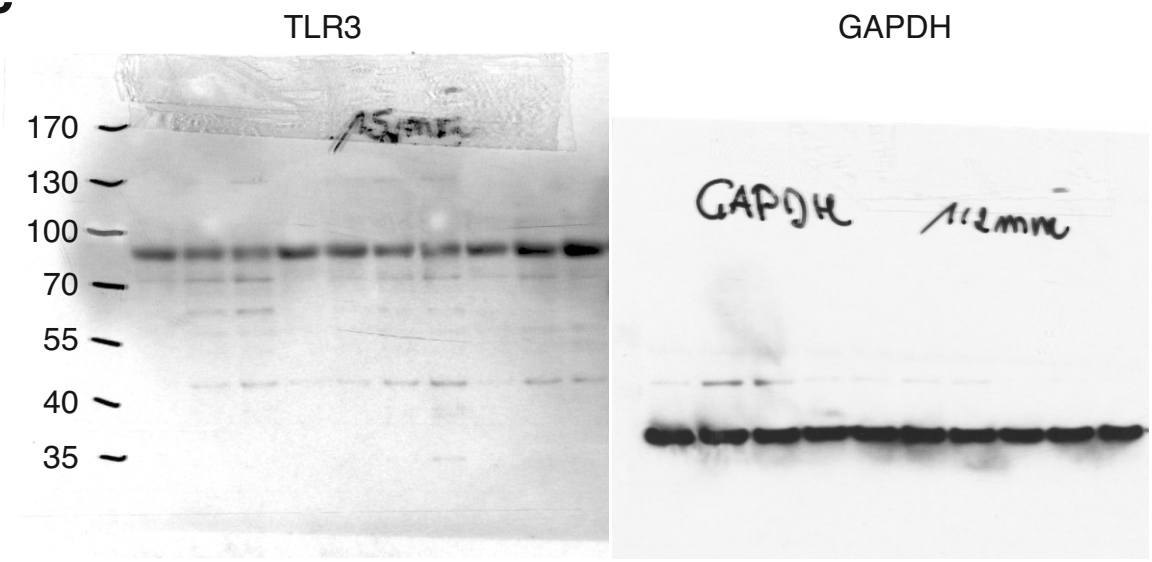

Membrane was first incubated with TLR3 antibody and later on with GAPDH antibody.

**Fig.1d**

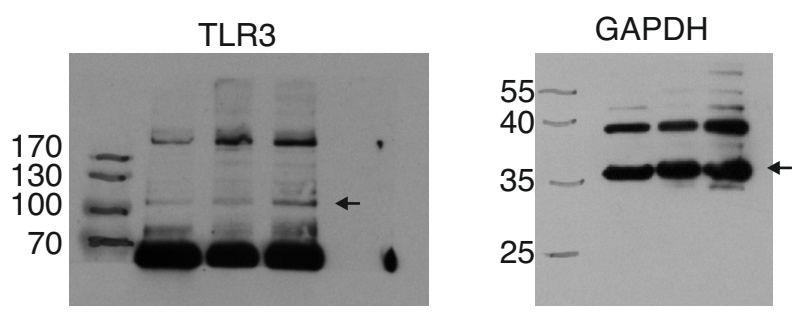

Membrane was cut between 55kDa and 70kDa. Upper part was incubated with TLR3 antibody, lower part with GAPDH antibody.

**Fig.2e**

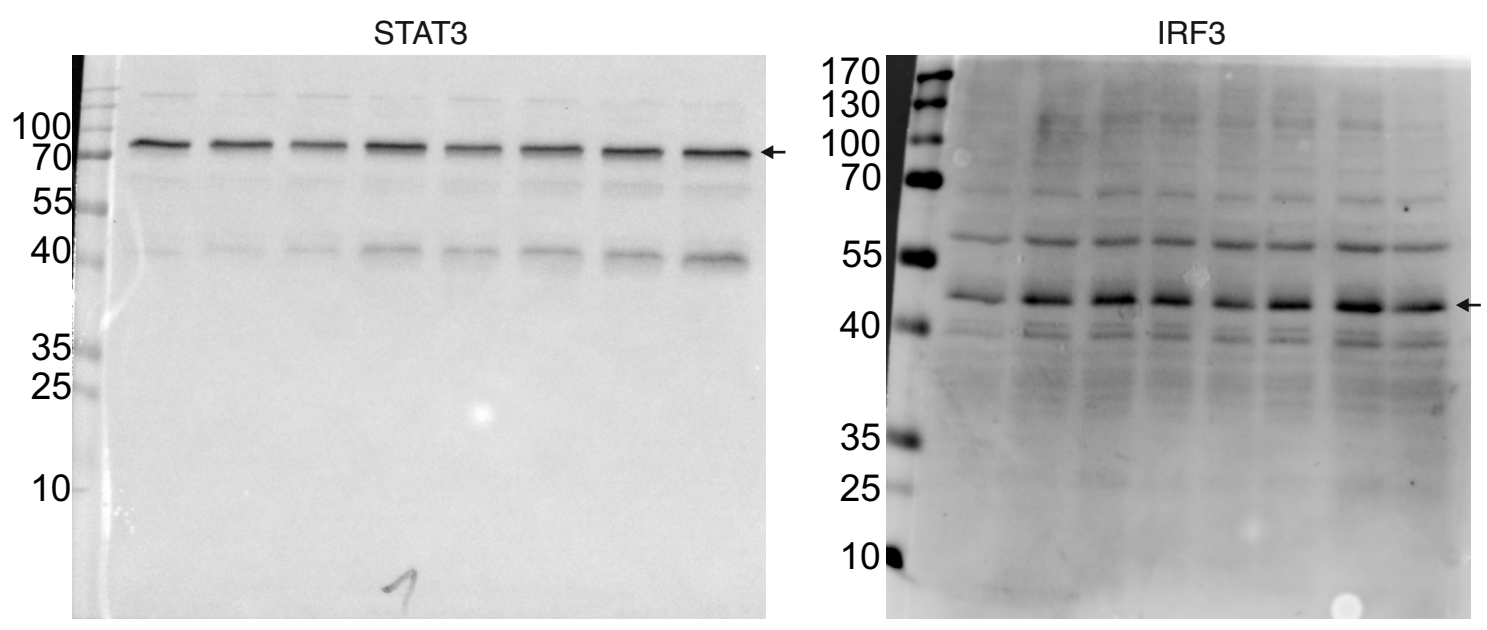

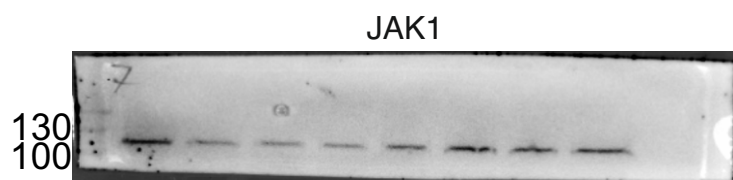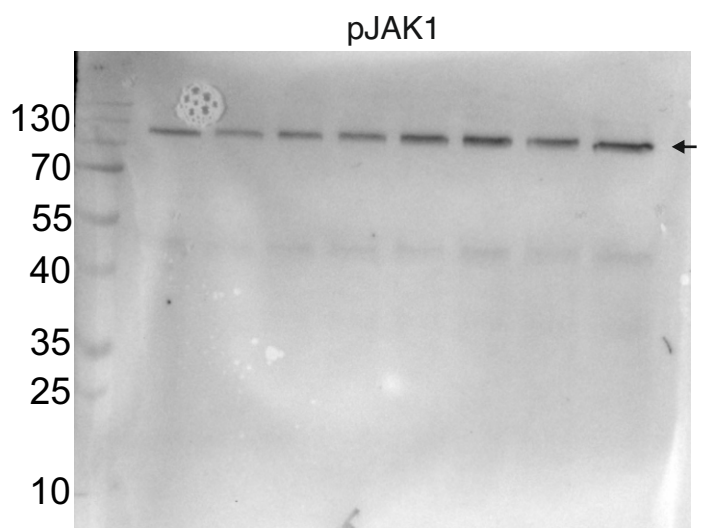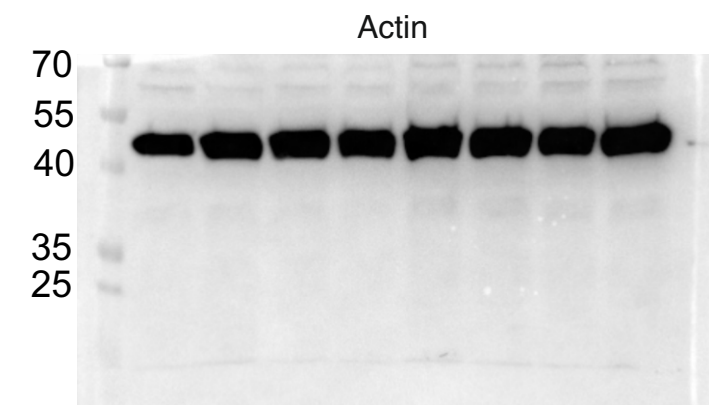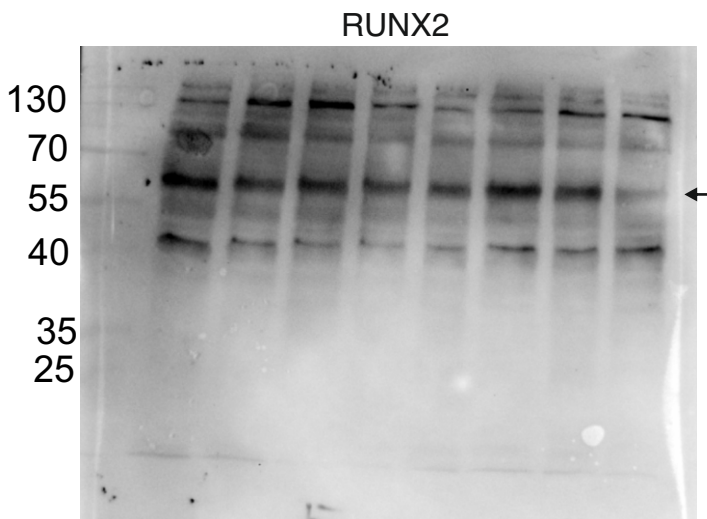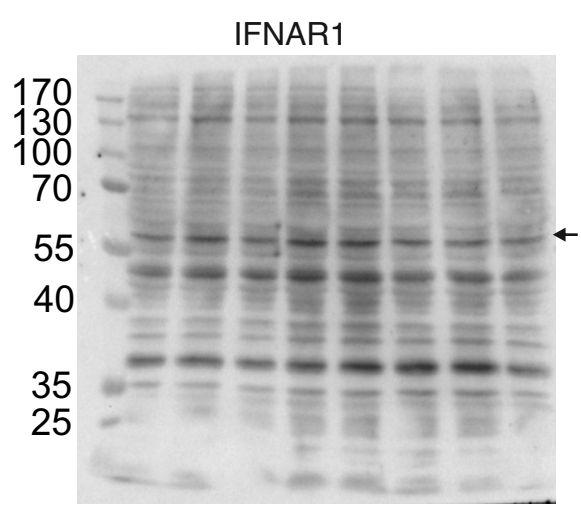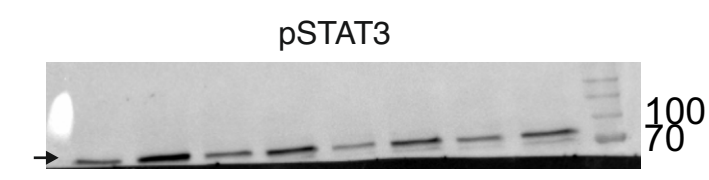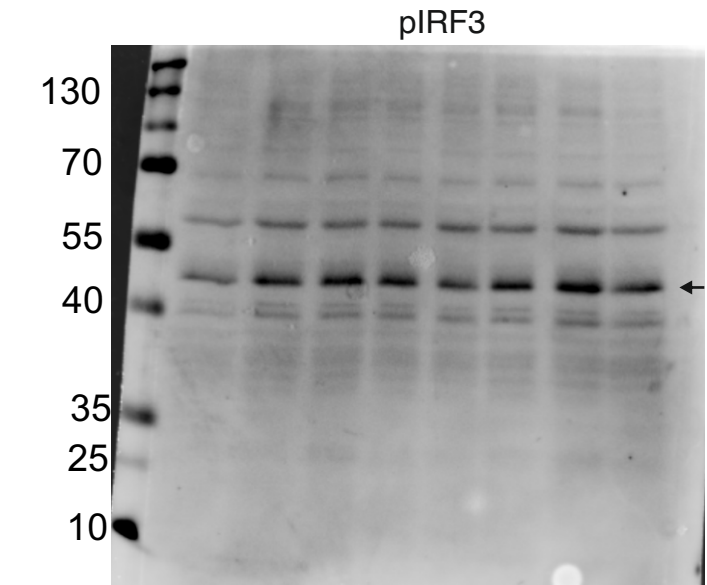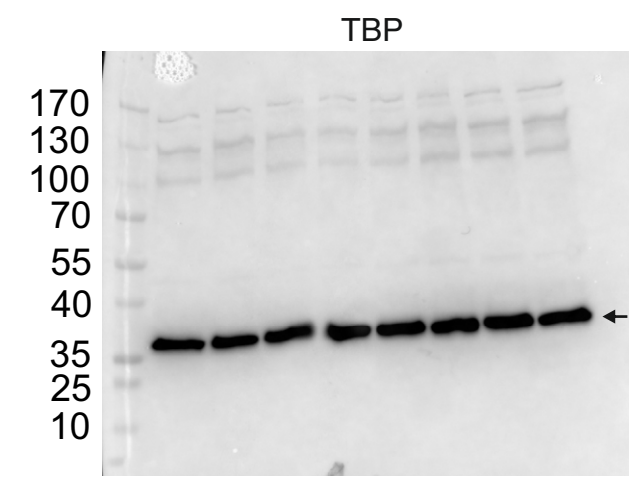

Subcellular fractionation was performed and phosphorylated proteins were detected in nuclear protein samples. TBP was used for nuclear fraction loading control.

**Fig.2g**

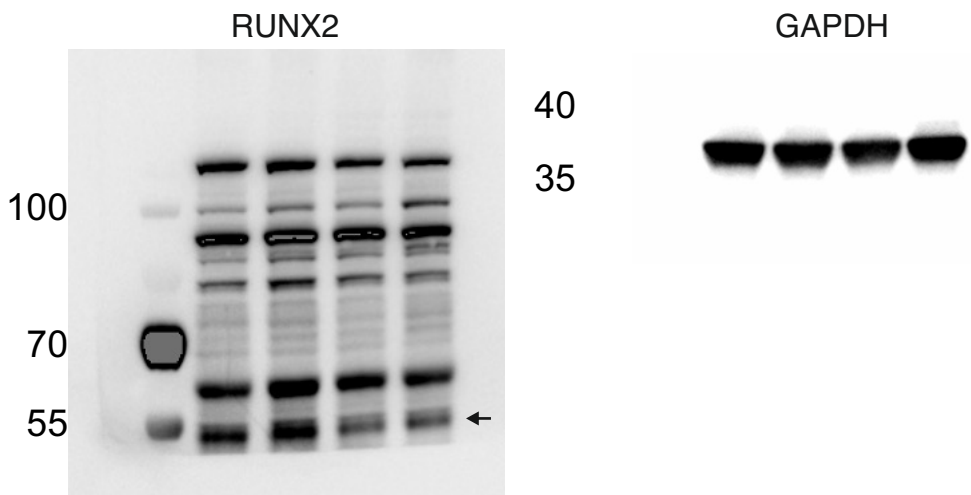

**Fig.4a**

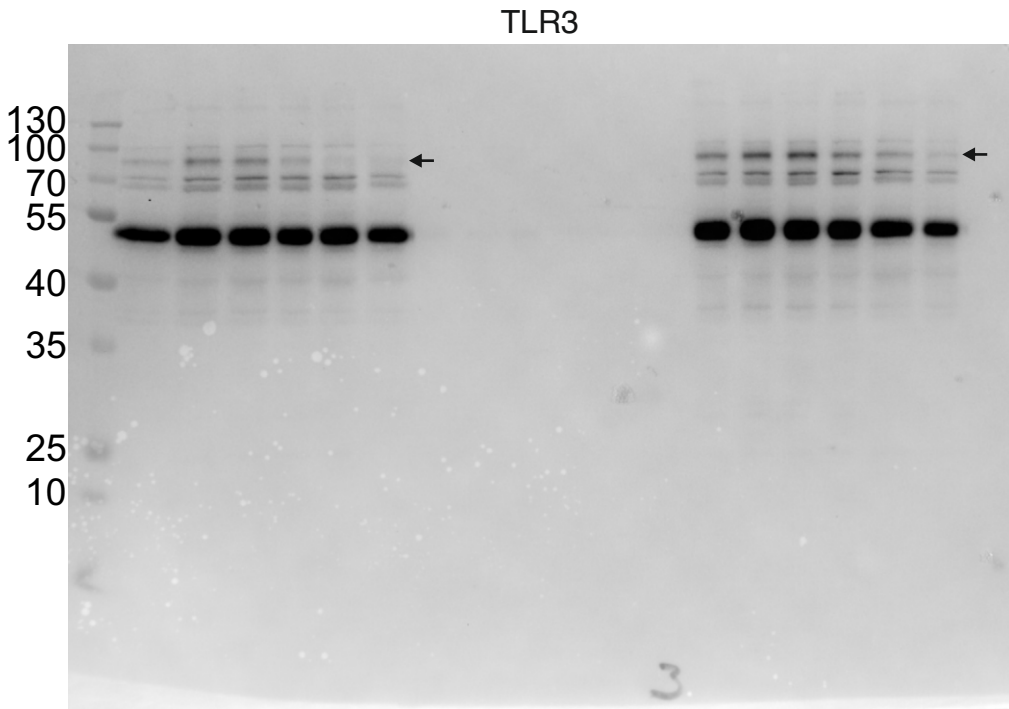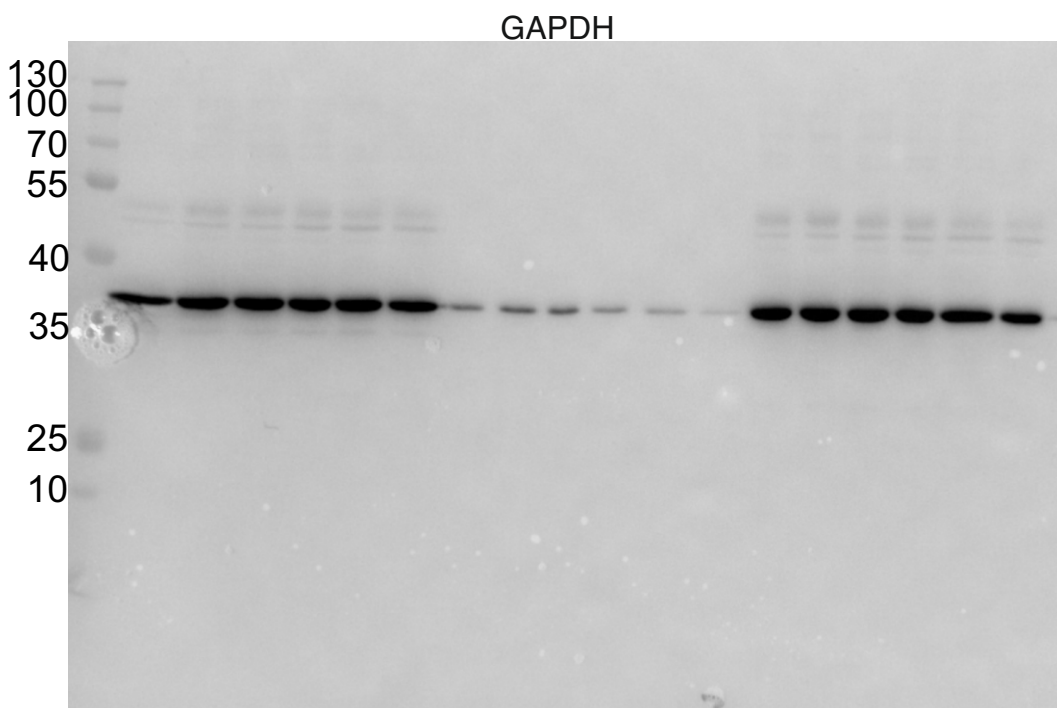

Membrane was first incubated with TLR3 antibody and later on with GAPDH antibody.

**Fig.4g**

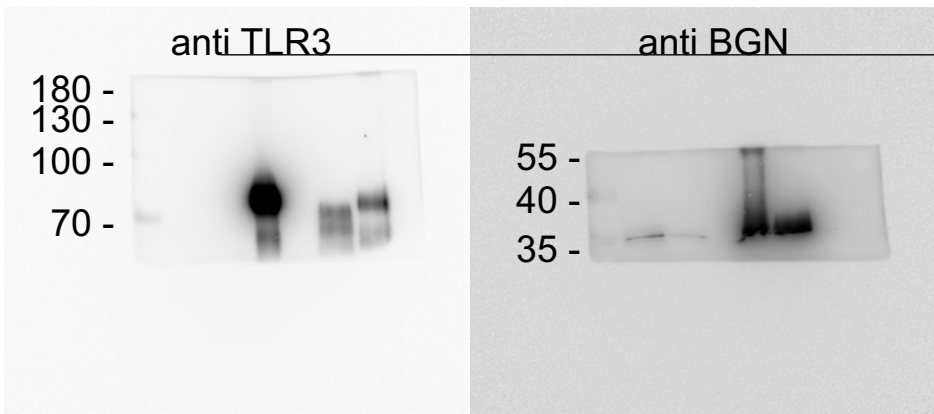

Membrane was cut between 55kDa and 70kDa.  
Upper part was used for detection of TLR3 ectodomain (~72kDa).  
Lower part was used for detection of purified SF21 BGN (~37kDa).

**Fig.4i**

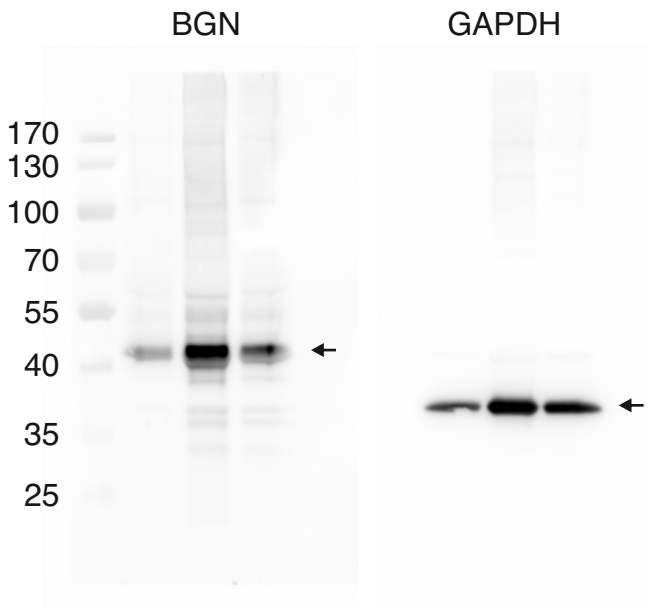

Membrane was first incubated with BGN antibody and later on with GAPDH antibody.

**Fig.4j**

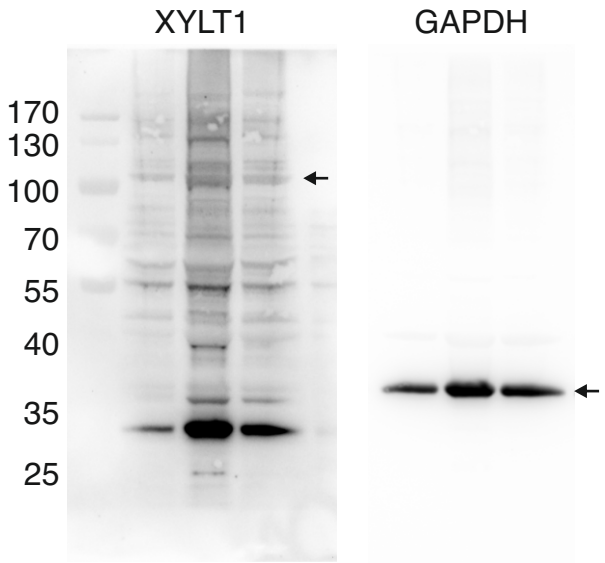

Membrane was first incubated with XYLT1 antibody and later on with GAPDH antibody.

**Fig.5c**

RUNX2 TLR3 KO

RUNX2 WT

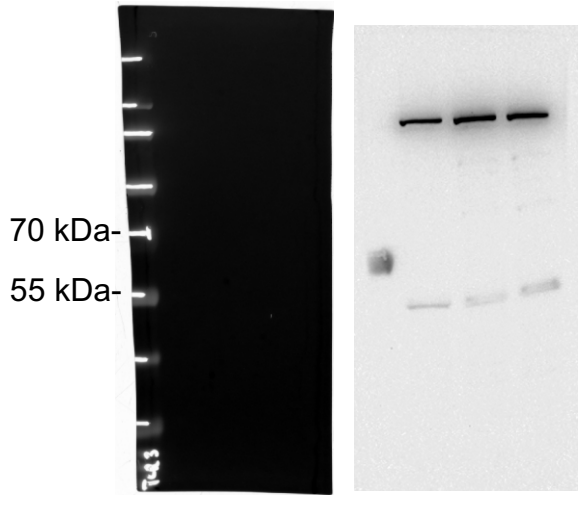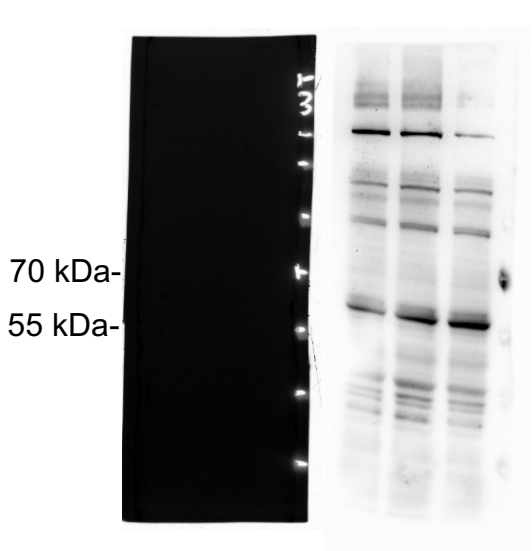

JAK1 TLR3 KO

JAK1 WT

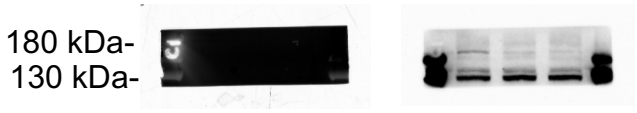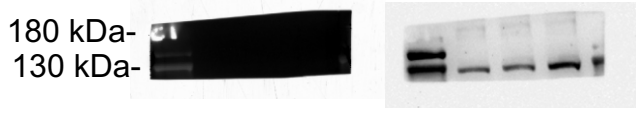

XYLT1 TLR3 KO

XYLT1 WT

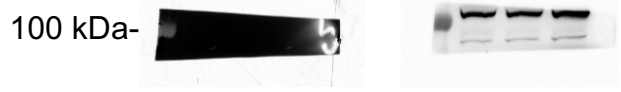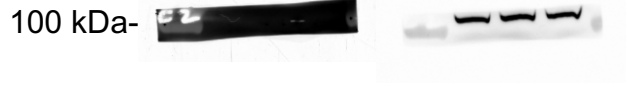

STAT3 TLR3 KO

STAT3 WT

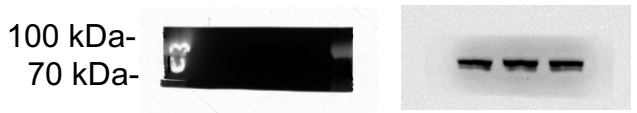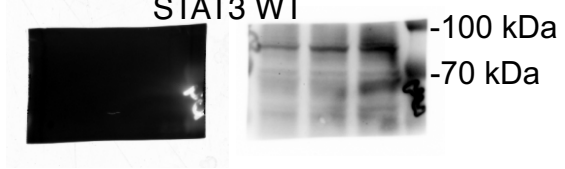

pIRF3 TLR3KO

pIRF3 WT

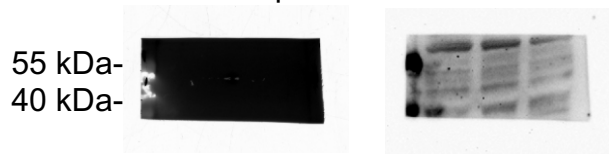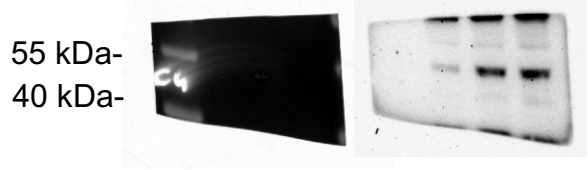

GAPDH TLR3 KO

GAPDH WT

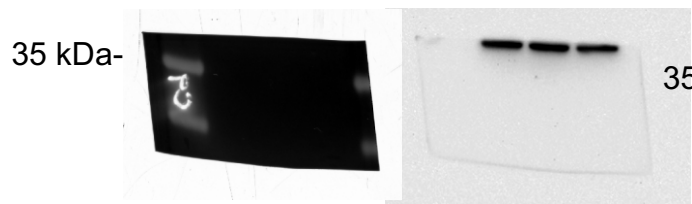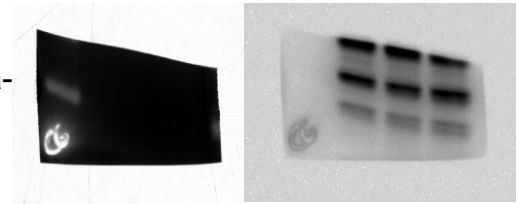

TLR3 TLR3 KO

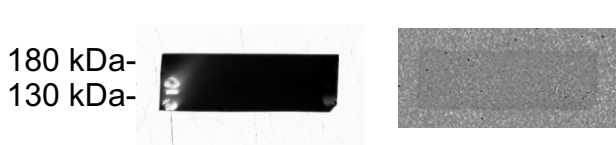

TLR3 WT

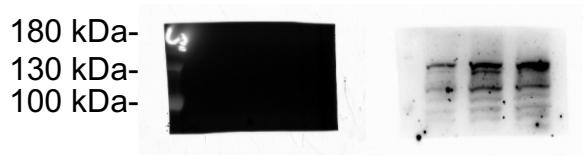

IFNAR1 TLR3 KO

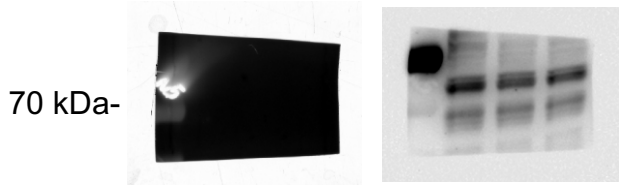

IFNAR1 WT

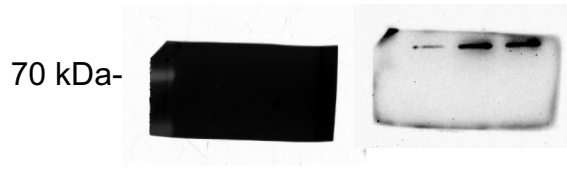

BGN TLR3 KO

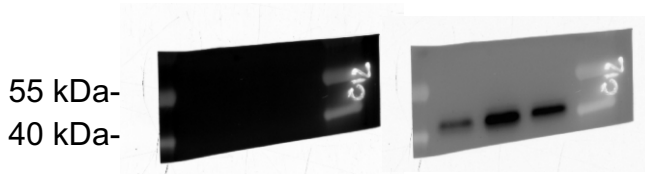

BGN WT

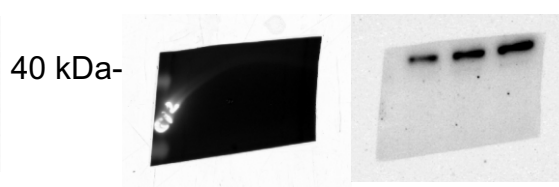

nuclear IRF3 TLR3 KO

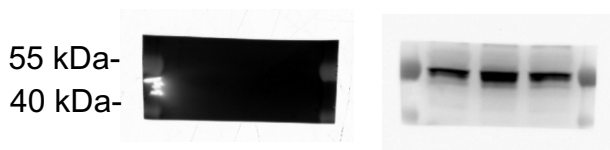

nuclear IRF3 WT

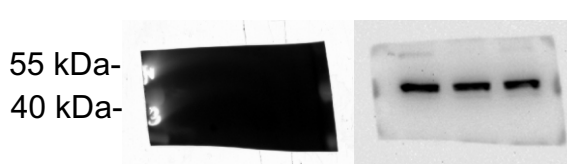

TBP TLR3 KO

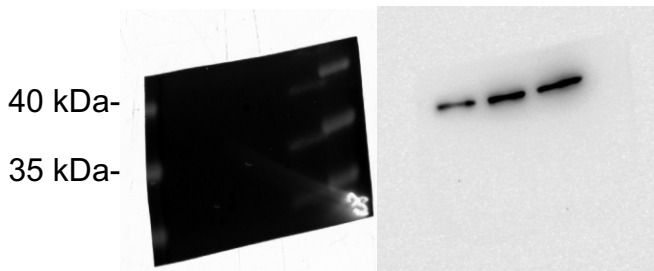

TBP WT

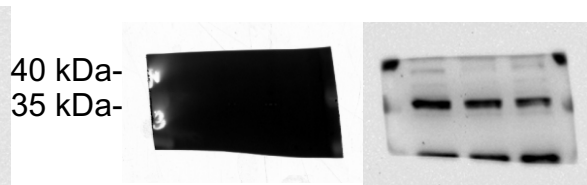

Subcellular fractionation was performed and IRF3 was detected as phosphorylated protein in nuclear protein samples. TBP was used for nuclear fraction loading control.

# Fig.S1g

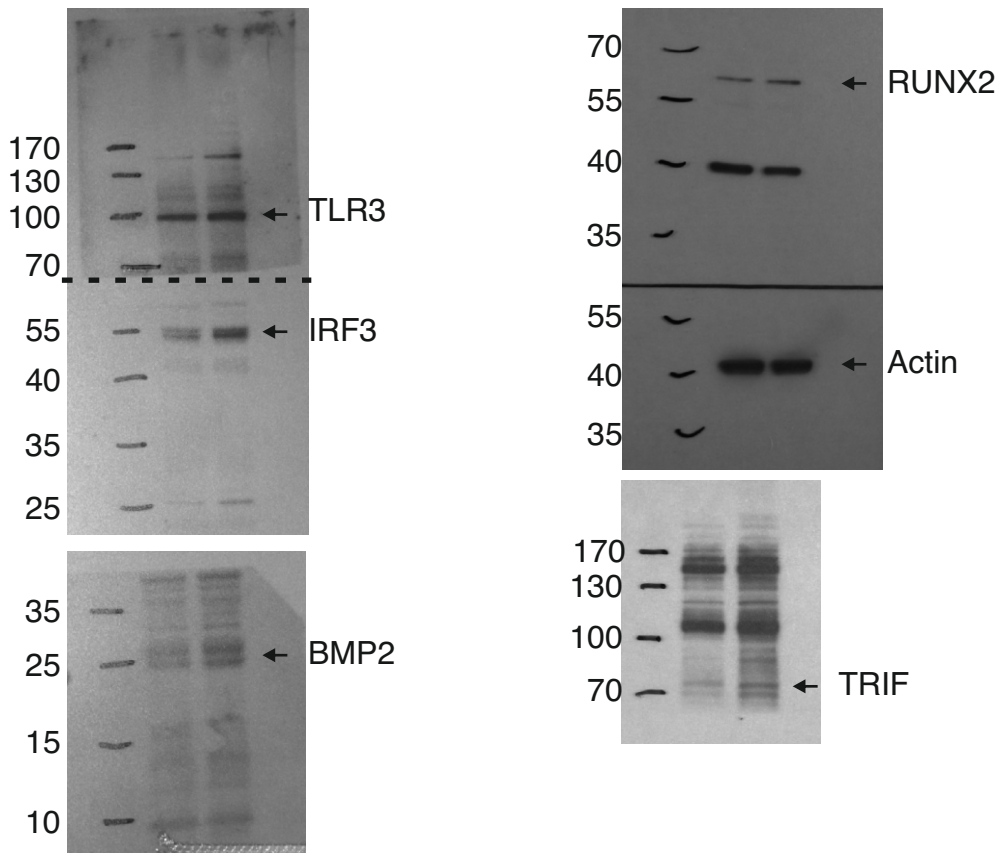

Membranes were cut between 55kDa and 70kDa. Upper parts was incubated with TLR3 and TRIF antibody. Lower parts with IRF3, Actin, RUNX2 and BMP2.

# Fig.S10

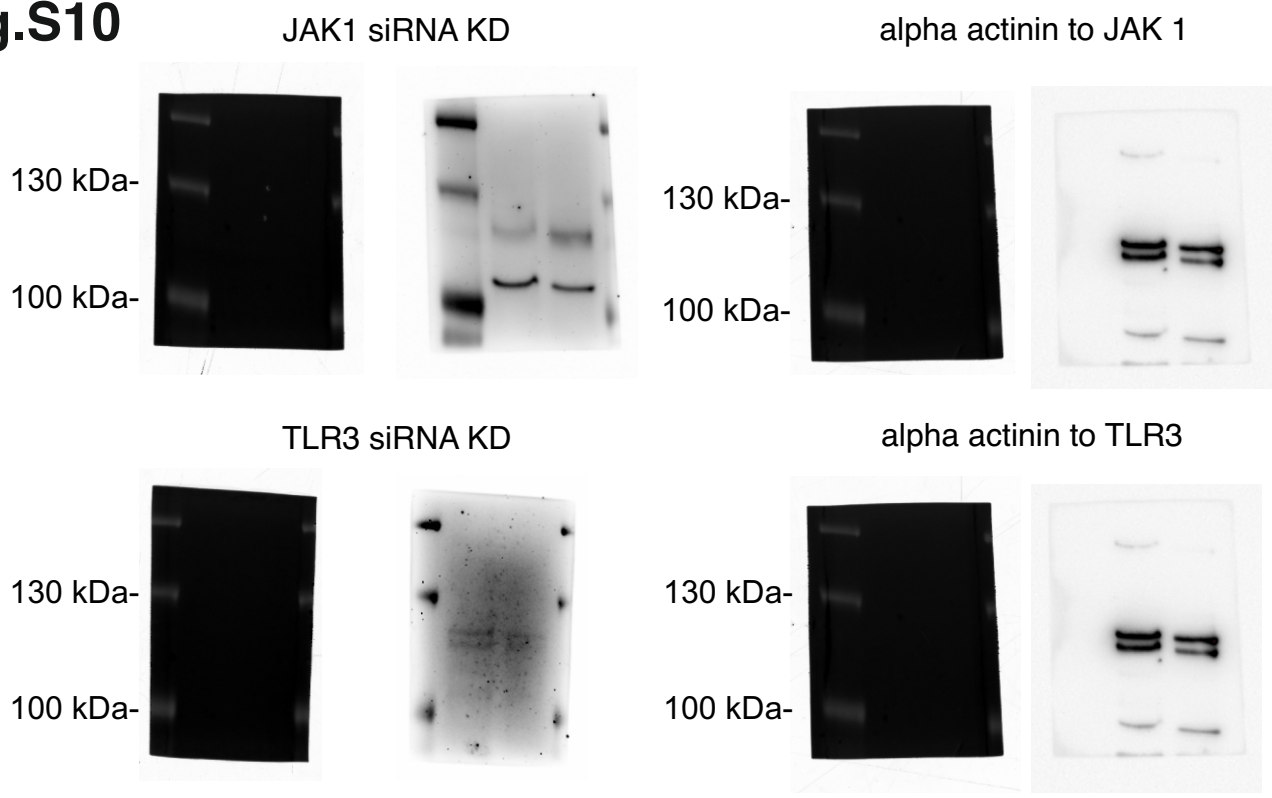

STAT3 siRNA KD

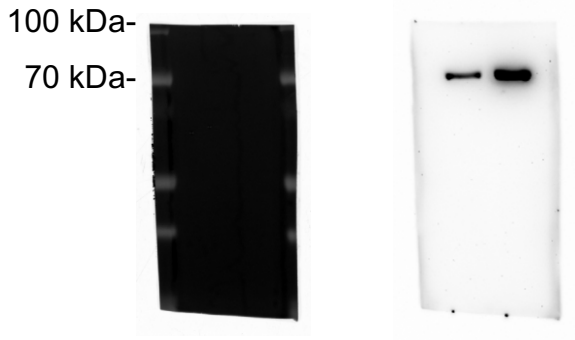

GAPDH to STAT3KD

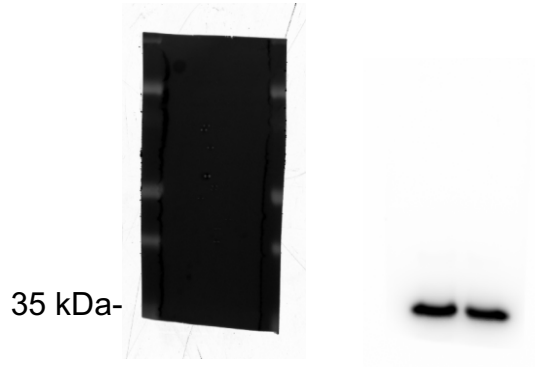

BGN siRNA KD

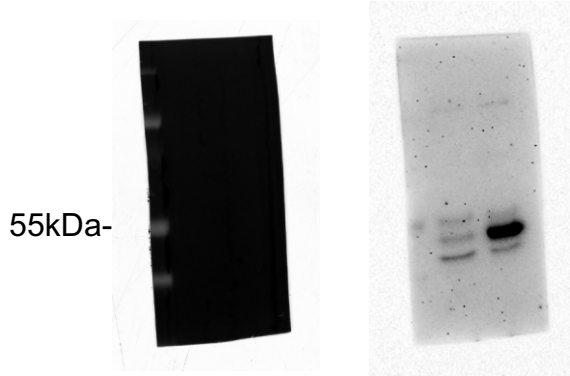

GAPDH to BGN

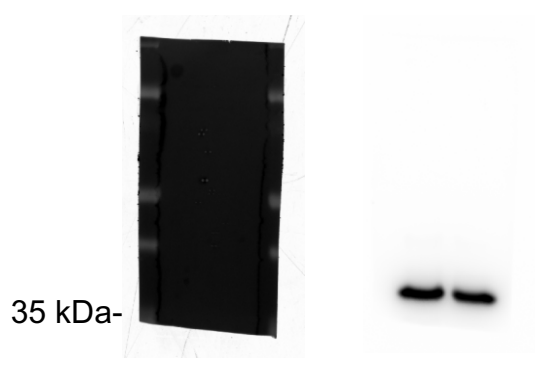

RUNX2 siRNA KD

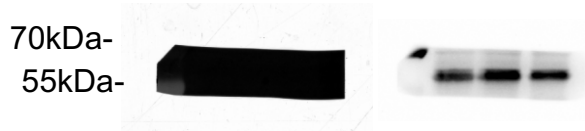

GAPDH to RUNX2

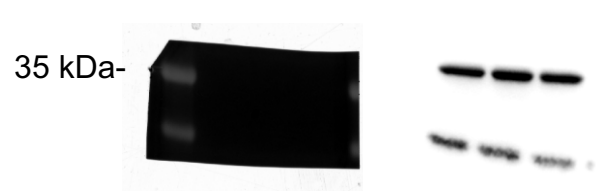

Supplement: NIHMS1884895-supplement-Western_Blot_Raw_Data.pdf [file NIHMS1884895-supplement-Western_Blot_Raw_Data.pdf]
